# Supplementary material for: Structural Phylogenomics Reveals Gradual Evolutionary Replacement of Abiotic Chemistries by Protein Enzymes in Purine Metabolism
Source: PubMed Central journal article supplement (PMC3596326; doi:10.1371/journal.pone.0059300), 2013-03-13
Supplement: pone.0059300.s002.pdf [file pone.0059300.s002.pdf]

**Table S1 Enzyme activities and associated FF assignments in purine metabolic pathways**

| Pathway | Enzyme       | FF domain | $nd_{FF}$ |
|---------|--------------|-----------|-----------|
| INT     | EC 3.6.4.1   | c.37.1.12 | 0.000     |
| INT     | EC 3.6.1.3   | c.37.1.20 | 0.004     |
| INT     | EC 3.6.1.3   | c.55.1.1  | 0.020     |
| INT     | EC 6.3.4.1   | c.23.16.1 | 0.057     |
| INT     | EC 6.3.4.4   | c.37.1.10 | 0.057     |
| INT     | EC 6.3.5.2   | c.23.16.1 | 0.057     |
| INT     | EC 6.3.4.1   | d.142.1.2 | 0.061     |
| INT     | EC 6.3.4.1   | c.30.1.1  | 0.061     |
| INT     | EC 2.7.4.8   | c.37.1.1  | 0.073     |
| INT     | EC 2.7.4.3   | c.37.1.1  | 0.073     |
| INT     | EC 4.3.2.2   | a.127.1.1 | 0.094     |
| INT     | EC 6.3.4.1   | c.26.2.1  | 0.098     |
| INT     | EC 6.3.5.2   | c.26.2.1  | 0.098     |
| INT     | EC 2.7.4.6   | d.58.6.1  | 0.139     |
| INT     | EC 2.7.1.40  | c.1.12.1  | 0.147     |
| INT     | EC 1.7.1.7   | c.1.5.1   | 0.147     |
| INT     | EC 1.1.1.205 | c.1.5.1   | 0.147     |
| INT     | EC 6.3.4.1   | b.84.1    | 0.160     |
| INT     | EC 3.6.1.19  | c.51.4.1  | 0.192     |
| INT     | EC 3.5.4.6   | c.1.9.1   | 0.249     |
| INT     | EC 3.6.4.1   | c.37.1.2  | 0.360     |
| INT     | EC 6.3.4.1   | d.104.1.2 | 0.390     |
| INT     | EC 6.3.5.2   | d.52.2.1  | 0.420     |
| INT     | EC 6.3.4.1   | d.52.2    | 0.420     |
| INT     | EC 3.6.1.3   | b.40.4.2  | 0.510     |
| INT     | EC 3.6.1.3   | a.60.2.1  | 0.547     |
| INT     | EC 3.6.1.3   | a.4.5.11  | 0.555     |
| INT     | EC 2.7.4.3   | g.41.2.1  | 0.555     |
| INT     | EC 3.6.1.6   | b.2.3     | 0.559     |
| INT     | EC 3.6.4.1   | b.34.3.1  | 0.560     |
| INT     | EC 3.5.4.6   | c.37.1.14 | 0.580     |
| INT     | EC 3.6.1.3   | a.5.1.1   | 0.606     |
| INT     | EC 3.6.1.14  | h.4.8.1   | 0.736     |
| INT     | EC 3.6.1.17  | d.113.1.1 | 0.718     |
| INT     | EC 1.7.1.7   | d.37.1    | 0.73      |
| INT     | EC 1.1.1.205 | d.37.1.1  | 0.731     |
| INT     | EC 3.6.1.6   | b.67.3    | 0.735     |
| INT     | EC 3.6.1.5   | b.67.3.1  | 0.735     |
| INT     | EC 3.6.1.14  | b.93.1.1  | 0.735     |
| INT     | EC 3.6.1.14  | a.137.8.1 | 0.735     |
| INT     | EC 2.7.1.40  | c.49.1.1  | 0.824     |
| INT     | EC 2.7.1.40  | b.58.1.1  | 0.824     |
| INT     | EC 3.6.1.8   | b.82.7.1  | 0.870     |
| INT     | EC 3.6.1.8   | f.33.1.1  | 0.882     |
| INT     | EC 3.6.1.8   | c.108.1.7 | 0.886     |

|     |             |           |       |
|-----|-------------|-----------|-------|
| INT | EC 3.6.4.1  | h.1.26.1  | 0.890 |
| INT | EC 3.6.1.8  | d.220.1.1 | 0.914 |
| INT | EC 3.6.4.1  | h.1.5.1   | 0.920 |
| INT | EC 3.6.4.1  | b.1.2.1   | 0.963 |
| INT | EC 3.6.4.1  | b.69.4.1  | 0.988 |
| INT | EC 3.6.4.1  | c.37.1.9  | 1.000 |
| BIO | EC 6.3.5.3  | c.23.16.1 | 0.057 |
| BIO | EC 6.3.4._  | c.23.16.1 | 0.057 |
| BIO | EC 6.3.4.13 | d.142.1.2 | 0.061 |
| BIO | EC 4.1.1.21 | d.142.1.2 | 0.061 |
| BIO | EC 6.3.4.13 | c.30.1.1  | 0.061 |
| BIO | EC 4.1.1.21 | c.30.1.1  | 0.061 |
| BIO | EC 2.4.2.14 | c.61.1.1  | 0.069 |
| BIO | EC 2.4.2.14 | d.153.1.1 | 0.086 |
| BIO | EC 4.3.2.2  | a.127.1.1 | 0.094 |
| BIO | EC 6.3.5.3  | d.79.4.1  | 0.110 |
| BIO | EC 6.3.3.1  | d.79.4.1  | 0.110 |
| BIO | EC 6.3.5.3  | d.139.1.1 | 0.110 |
| BIO | EC 6.3.3.1  | d.139.1.1 | 0.110 |
| BIO | EC 3.5.4.10 | c.97.1.4  | 0.170 |
| BIO | EC 2.1.2.3  | c.97.1.4  | 0.170 |
| BIO | EC 6.3.4.13 | b.84.2.1  | 0.188 |
| BIO | EC 4.1.1.21 | b.84.2.1  | 0.188 |
| BIO | EC 3.5.4.10 | c.24.1.3  | 0.188 |
| BIO | EC 2.1.2.3  | c.24.1.3  | 0.188 |
| BIO | EC 2.1.2.2  | c.65.1.1  | 0.188 |
| BIO | EC 6.3.2.6  | d.143.1.1 | 0.188 |
| BIO | EC 4.1.1.21 | c.23.8.1  | 0.196 |
| BIO | EC 6.3.5.3  | d.284.1.2 | 0.347 |
| BIO | EC 6.3.5.3  | a.5.10.1  | 0.367 |
| CAT | EC 2.4.2.8  | c.61.1.1  | 0.069 |
| CAT | EC 2.4.2.7  | c.61.1.1  | 0.069 |
| CAT | EC 2.4.2.22 | c.61.1.1  | 0.069 |
| CAT | EC 2.7.1.74 | c.37.1.1  | 0.073 |
| CAT | EC 3.2.2.4  | c.56.2.1  | 0.171 |
| CAT | EC 2.4.2.1  | c.56.2.1  | 0.171 |
| CAT | EC 2.7.1.73 | c.72.1.1  | 0.176 |
| CAT | EC 2.7.1.20 | c.72.1.1  | 0.176 |
| CAT | EC 1.17.1.4 | c.68.1.13 | 0.230 |
| CAT | EC 3.5.4.4  | c.1.9.1   | 0.249 |
| CAT | EC 3.1.3.6  | c.106.1   | 0.420 |
| CAT | EC 3.1.3.5  | 1.17.3.2  | 0.457 |
| CAT | EC 3.1.3.5  | d.114.1.1 | 0.457 |
| CAT | EC 3.5.4.2  | b.92.1.1  | 0.604 |
| CAT | EC 3.5.4.2  | c.1.9.2   | 0.610 |
| CAT | EC 3.5.4.2  | a.35.1.2  | 0.610 |
| CAT | EC 3.5.4.2  | e.7.1.2   | 0.616 |
| CAT | EC 3.5.4.2  | c.1.9.9   | 0.620 |
| CAT | EC 3.5.4.2  | c.1.9.14  | 0.620 |

|     |             |           |       |
|-----|-------------|-----------|-------|
| CAT | EC 3.5.4.2  | c.1.9.18  | 0.640 |
| CAT | EC 3.5.4.2  | b.92.1.3  | 0.660 |
| CAT | EC 3.5.4.2  | b.92.1.5  | 0.657 |
| CAT | EC 3.5.4.2  | b.92.1.7  | 0.657 |
| CAT | EC 3.5.4.2  | b.92.1.9  | 0.657 |
| CAT | EC 3.5.4.3  | c.97.1.2  | 0.661 |
| CAT | EC 3.1.3.5  | c.108.1.8 | 0.706 |
| CAT | EC 1.17.3.2 | d.15.4.2  | 0.750 |
| CAT | EC 1.17.1.4 | d.15.4.2  | 0.751 |
| CAT | EC 3.2.2.8  | c.70.1.1  | 0.824 |
| CAT | EC 3.2.2.1  | c.70.1.1  | 0.824 |
| CAT | EC 3.5.4.4  | c.69.1.24 | 0.848 |
| CAT | EC 3.5.4.4  | b.70.3.1  | 0.848 |
| CAT | EC 1.17.1.4 | d.87.2.1  | 0.853 |
| CAT | EC 1.17.3.2 | d.87.2.1  | 0.853 |
| CAT | EC 1.17.1.4 | a.56.1.1  | 0.857 |
| CAT | EC 1.17.3.2 | a.56.1.1  | 0.857 |
| CAT | EC 1.17.3.2 | d.41.1.1  | 0.861 |
| CAT | EC 1.17.1.4 | d.41.1.1  | 0.861 |
| CAT | EC 1.17.3.2 | d.145.1.3 | 0.865 |
| CAT | EC 1.17.1.4 | d.145.1.3 | 0.870 |
| CAT | EC 1.17.3.2 | d.133.1.1 | 0.869 |
| CAT | EC 3.5.4.2  | c.1.9.6   | 0.890 |
